# Supplementary material for: Proteomic comparison of colorectal tumours and non-neoplastic mucosa from paired patient samples using iTRAQmass spectrometry
Source: Royal Society of Chemistry journal article supplement (doi:10.1039/c1mb05236e), 2011-08-02
Supplement: c1mb05236e.pdf [file c1mb05236e.pdf]

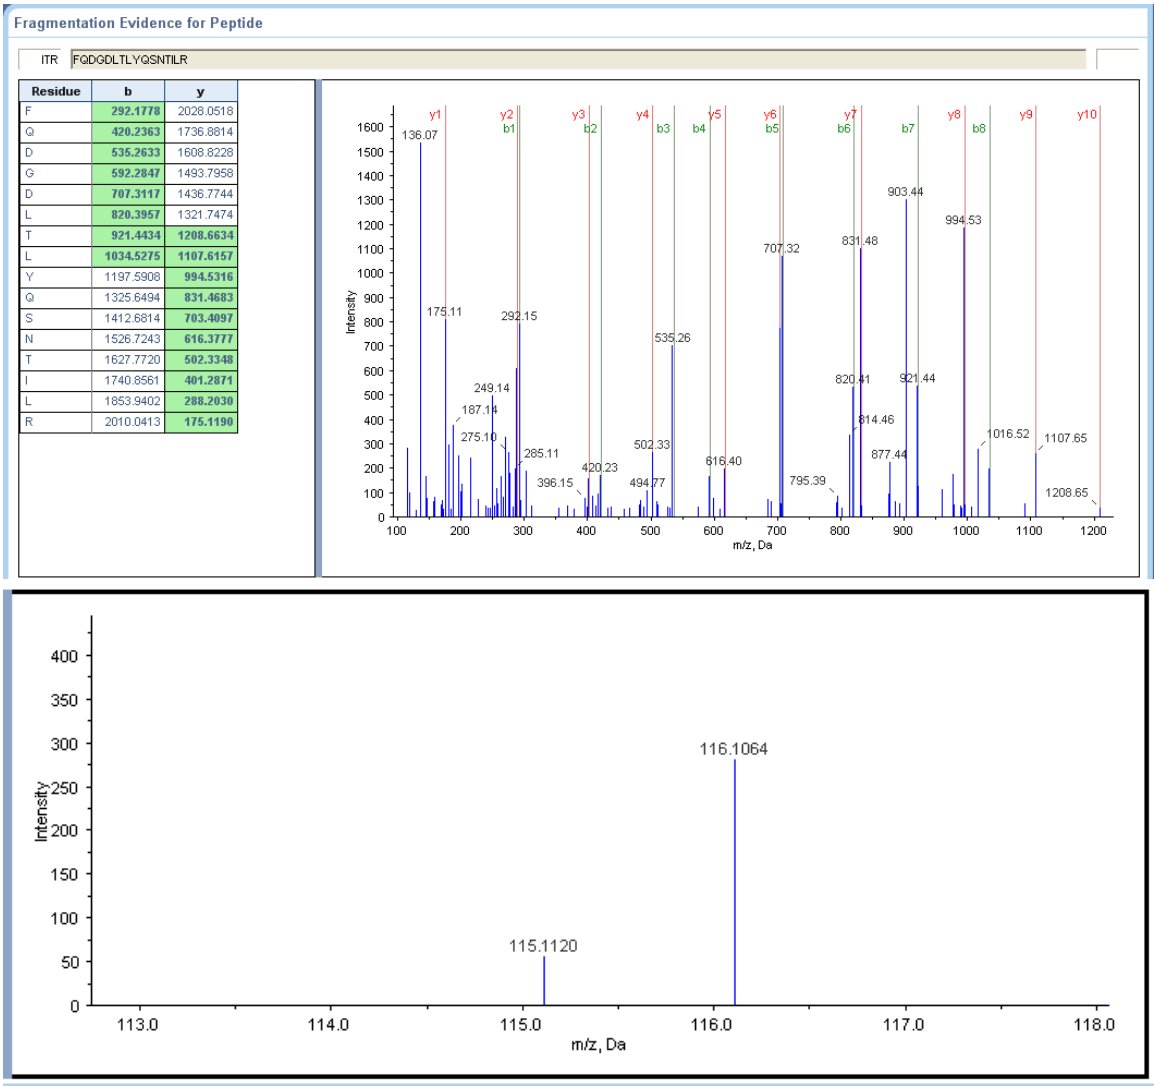

**Supplementary Figure 1.** Screenshot of ProteinPilot software showing MS/MS evidence for the 3+ peptide (676.7 m/z) #FQDGDLTLYQSNTILR from GST-pi, where # is an N-terminal iTRAQ moiety. The iTRAQ reagent reporter region of the MS/MS spectrum (114-117Da) is shown in profile mode. Integration of the iTRAQ reporter ions is used to calculate peptide ratios. The iTRAQ 115Da and 116Da reagent labeled CRC from patients PL132 and PL138 respectively, while the paired adjacent mucosa was labeled with 114Da and 117Da reagent for the respective patients.

**Histogram of unadjusted p-values**

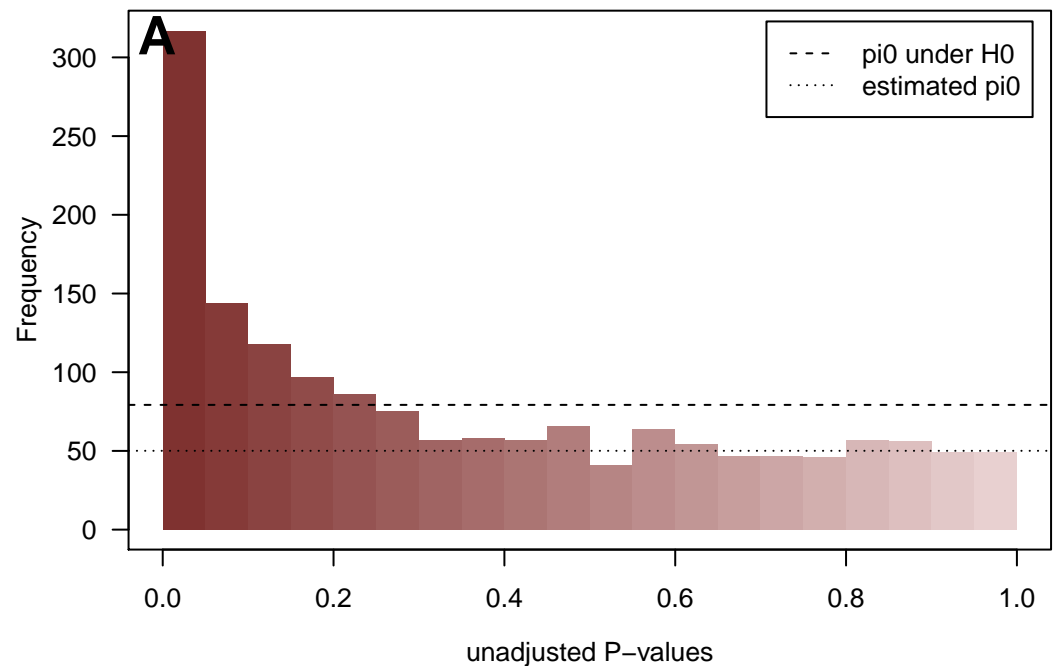

**Histogram of q-values**

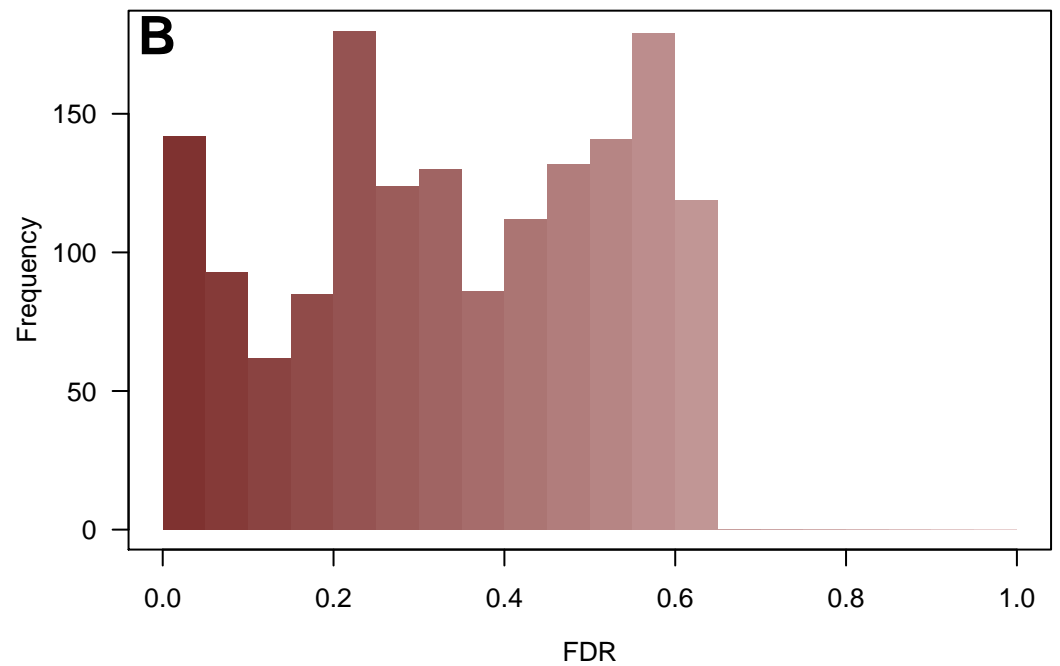

**Volcano Plot**

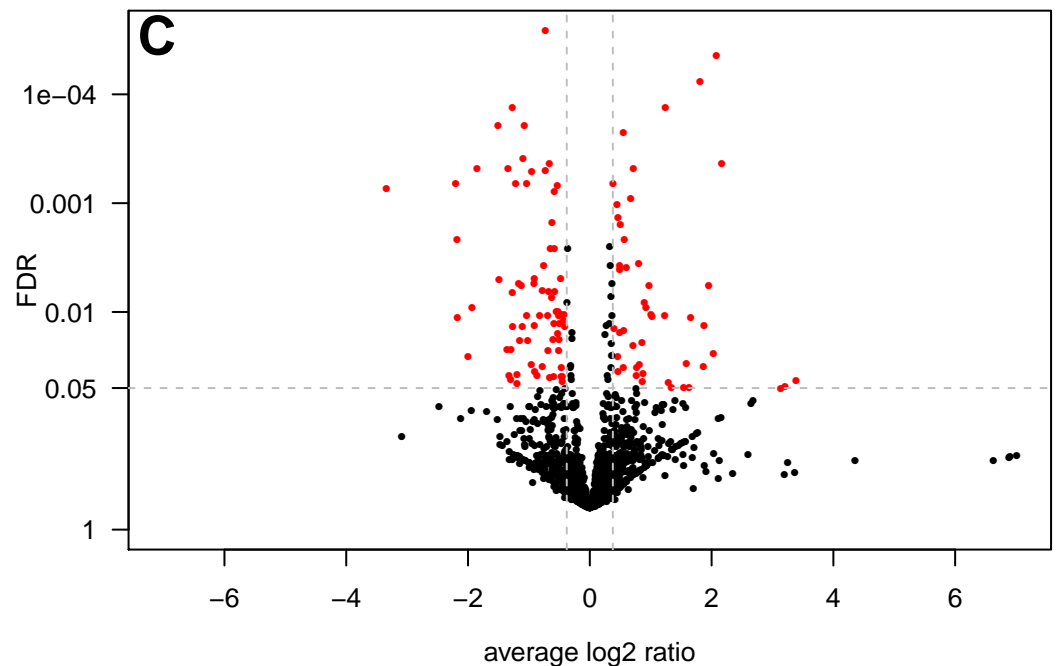

**sensitivity analysis**

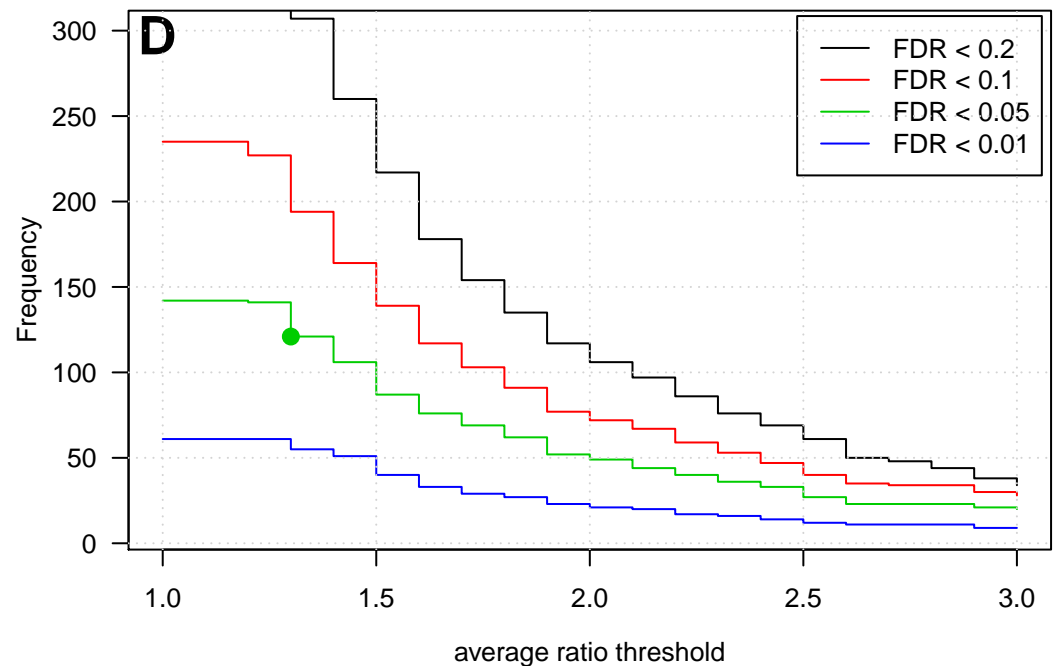

**Supplementary Figure 2: Differentially expressed proteins in colorectal tumours relative to non-neoplastic mucosa.** Differences in protein abundance between tumour and normal mucosa across 16 patients was assessed using a moderated t-test, with adjustment for multiple correction by the positive FDR<sup>20</sup>. A) histogram of the unadjusted p-values resulting from testing 1483 proteins for differential expression. Dashed line = expected proportion if all proteins were not differentially expressed; dotted line = actual proportion of differentially expressed proteins determined by the positive FDR method. B) histogram of FDR values, indicating a large spike of proteins with FDR<0.05. This histogram stops at 0.633, since that is the maximum FDR of this dataset. C) volcano plot of average log2 ratio (x-axis) vs FDR (y-axis, -log10 scale) for each protein. Red dots are differentially expressed with FDR<0.05 (above horizontal dashed line) and fold change > 1.3 (either side of vertical dashed lines). D) sensitivity analysis indicating the number of DE proteins across a range of fold change thresholds (x-axis) and a number of FDR thresholds (coloured lines). Green dot = FDR<0.05 and FC>1.3.

**Supplementary Figure 3.** TGM2 expression is diminished in tumour cells compared to adjacent normal mucosa as shown by immunohistochemistry on conventional tissue sections from the same patient samples that were used for immunoblotting (Fig.3). The images show strong positive staining of cells in the crypts of the normal mucosa in each case compared to negative staining of tumour cells in sample PL140 (A); weak staining of tumour cells in sample PL12 (B); negative staining of tumour cells in PL36 (C); and weak staining of tumour cells in PL97(D) (original magnification 200x).

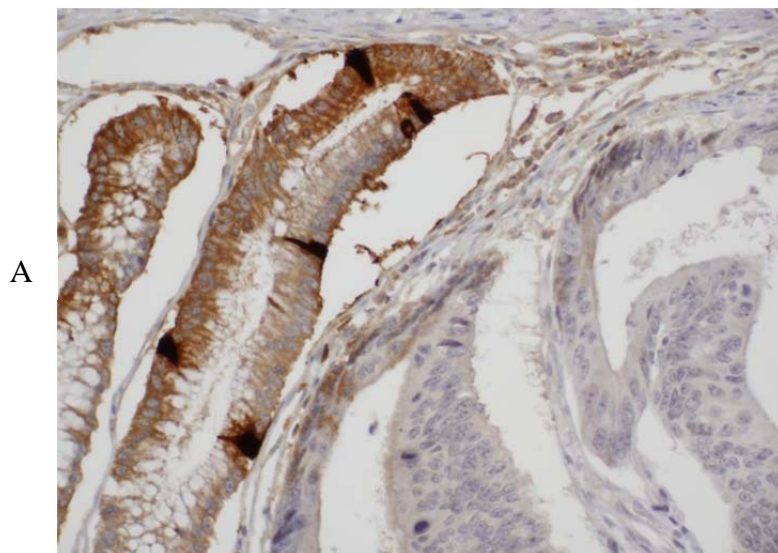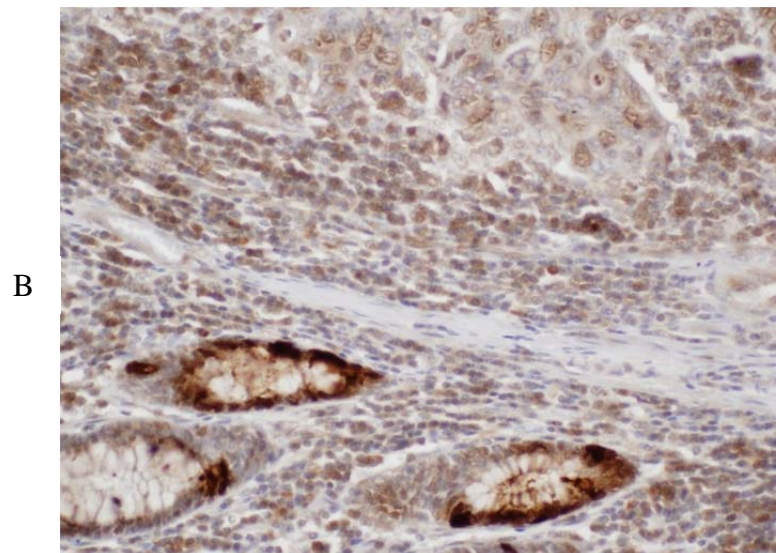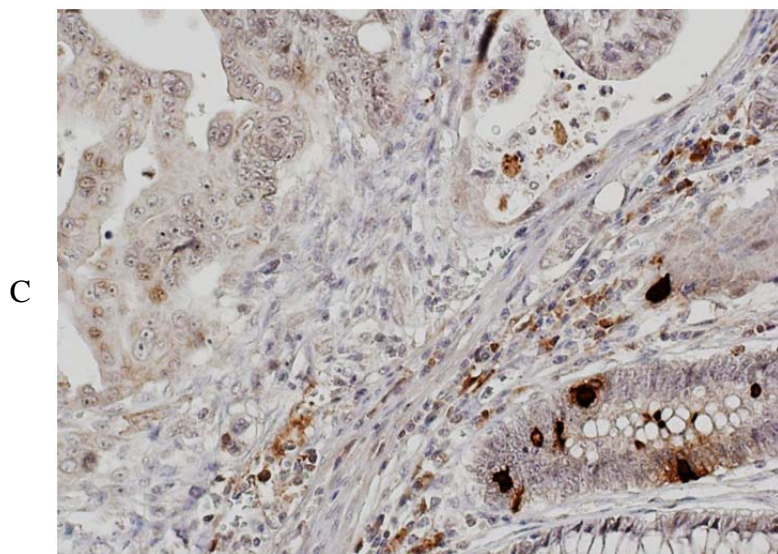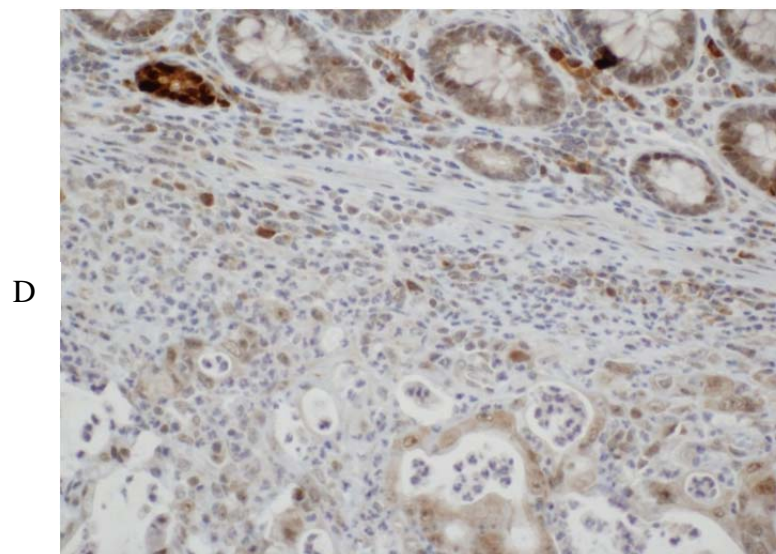

**Supplementary Table 1. Clinicopathological data of CRC patients.**

| Patient ID | Sub-stage* | Tumour location  | Age | Gender |
|------------|------------|------------------|-----|--------|
| PL 145     | A2         | Ascending colon  | 64  | Female |
| PL 67      | A3         | Rectum           | 76  | Female |
| PL 144     | A3         | Ascending colon  | 76  | Female |
| PL 12      | B1         | Transverse colon | 80  | Female |
| PL 140     | B1         | Ascending colon  | 84  | Male   |
| PL 284     | B1         | Ascending colon  | 60  | Male   |
| PL 318     | B1         | Ascending colon  | 83  | Male   |
| PL 226     | B1         | Cecum            | 60  | Female |
| PL 97      | C1         | Hepatic flexure  | 72  | Male   |
| PL 23      | C1         | Sigmoid colon    | 65  | Female |
| PL 36      | C1         | Splenic flexure  | 78  | Male   |
| PL 32      | C1         | Rectum           | 63  | Male   |
| PL 47      | C1         | Ascending colon  | 75  | Female |
| PL 132     | D2         | Cecum            | 69  | Male   |
| PL 138     | D2         | Cecum            | 87  | Male   |
| PL 173     | D2         | Cecum            | 92  | Male   |

\*Reference<sup>36</sup>

**Supplementary Table 3.** IHC quantitation of tumour compared to normal mucosa.  
Numbers refer to observations from 16 samples.

| Protein      | # elevated in tumour | # no change | # reduced in tumour |
|--------------|----------------------|-------------|---------------------|
| AGR2         | 1                    | 6           | 9                   |
| Beta-catenin | 1                    | 11          | 4                   |
| Caldesmon    | 16                   | -           | -                   |
| CEA          | 12                   | 3           | 1                   |
| CK-20        | -                    | 3           | 13                  |
| Galectin-3   | -                    | 5           | 11                  |
| HLA-DR       | 7                    | 5           | 4                   |
| Maspin       | 13                   | 2           | 1                   |
| S100A8/A9    | 16                   | -           | -                   |
| Stat-1       | 3                    | 4           | 9                   |
| TGM2         | -                    | -           | 16                  |
